# Supplementary material
Source: Royal Society of Chemistry journal article supplement (doi:10.1039/d6ta02169g)
Supplement: d6ta02169g1.pdf [file d6ta02169g1.pdf]

## Supplementary material

### Breath-Fig.-Derived Porous Hybrid Layers for Safety-Enhanced Separators in Lithium-Ion Batteries

Yeong Hun Jeong<sup>a</sup>, Jae Bin Park<sup>b</sup>, Min Seo Jo<sup>a</sup>, Sinyoung Seo<sup>a</sup>, Da-Sol Kwon<sup>c,d</sup>, Jin Hong Lee<sup>b\*</sup>, Jimin Shim<sup>a\*</sup>

<sup>a</sup>Department of Chemistry Education, Seoul National University, Seoul 08826, Republic of Korea

<sup>b</sup>School of Chemical Engineering, Pusan National University, 2, Busandaehak-ro 63beon-gil, Geumjeong-gu, Busan 46241, Republic of Korea

<sup>c</sup>Department of Chemical and Biological Engineering, Korea University, 145 Anam-ro, Seongbuk-gu, Seoul 02841, Republic of Korea,

<sup>d</sup>Energy Storage Research Center, Korea Institute of Science and Technology (KIST), 14 Gil 5 Hwarang-ro, Seongbuk-gu, Seoul 02792, Republic of Korea

**\*Corresponding Author:** [jinhong.lee@pusan.ac.kr](mailto:jinhong.lee@pusan.ac.kr) (J. H. Lee) & [jiminshim@snu.ac.kr](mailto:jiminshim@snu.ac.kr) (J. Shim)

**Table S1.** Raw parameters for the calculation of  $\text{Li}^+$  transference number ( $t_{\text{Li}^+}$ ) derived from chronoamperometry and EIS measurements for PE and PVB@PE separators.

| Separator | $I_0$ (mA) | $I_{\text{ss}}$ (mA) | $R_0$ ( $\Omega$ ) | $R_{\text{ss}}$ ( $\Omega$ ) | $t_{\text{Li}^+}$ |
|-----------|------------|----------------------|--------------------|------------------------------|-------------------|
| PE        | 0.112      | 0.092                | 90.0               | 101.5                        | 0.36              |
| PVB@PE    | 0.108      | 0.094                | 60.0               | 61.5                         | 0.73              |

**Table S2.** Comparison of ionic conductivity, transference number, and  $\text{Li}^+$  conductivity of the PVB@PE with previously published works.

| Separators               | Ionic conductivity (mS $\text{cm}^{-1}$ ) | Transference number ( $t_{\text{Li}^+}$ ) | $\text{Li}^+$ conductivity <sup>a</sup> (mS $\text{cm}^{-1}$ ) | Ref.            |
|--------------------------|-------------------------------------------|-------------------------------------------|----------------------------------------------------------------|-----------------|
| PE                       | 0.34                                      | 0.36                                      | 0.12                                                           | This work       |
| PVB@PE                   | 0.75                                      | 0.73                                      | 0.54                                                           |                 |
| LSO-SiO <sub>2</sub> @PE | 0.41                                      | 0.41                                      | 0.17                                                           | R1 <sup>1</sup> |
| PEAO-LTO                 | 0.72                                      | 0.61                                      | 0.44                                                           | R2 <sup>2</sup> |
| PVDF/ZSM-Si (Al)@PE      | 0.54                                      | 0.44                                      | 0.24                                                           | R3 <sup>3</sup> |
| PEI-PSS-PLLgPEG          | 0.67                                      | 0.42                                      | 0.28                                                           | R4 <sup>4</sup> |

<sup>a</sup> $\text{Li}^+$  conductivity was calculated as the product of ionic conductivity and  $t_{\text{Li}^+}$ .

**Table S3.** Comparison of thermal stability and SET of the PVB@PE with previously published works.

| Separators                              | Thermal stability ( $^{\circ}\text{C}$ ) | SET (s $\text{g}^{-1}$ ) | Ref.            |
|-----------------------------------------|------------------------------------------|--------------------------|-----------------|
| PE                                      | 130                                      | 410                      | This work       |
| PVB@PE                                  | 150                                      | 9.9                      |                 |
| PP/(PVDF-HFP/MPP)                       | 150                                      | 20                       | R5 <sup>5</sup> |
| MT31/PE                                 | 130                                      | 133                      | R6 <sup>6</sup> |
| PDA@mAl <sub>2</sub> O <sub>3</sub> -PE | 150                                      | 50                       | R7 <sup>7</sup> |
| F/PI                                    | 160                                      | 19                       | R8 <sup>8</sup> |

**Table S4.** Comparative summary of key physical and electrochemical properties for PE, PVB@PE (non-porous), and PVB@PE (porous) separators.

| Metric                                                      | PE   | PVB@PE<br>(non-porous) | PVB@PE<br>(porous) |
|-------------------------------------------------------------|------|------------------------|--------------------|
| Gurley number<br>(s 100 cm <sup>-3</sup> μm <sup>-1</sup> ) | 7.0  | Not detected           | 4.2                |
| Ionic conductivity (mS cm <sup>-1</sup> )                   | 0.34 | 0.44                   | 0.75               |
| Electrolyte uptake (%)                                      | 101  | 108                    | 187                |
| SET (s g <sup>-1</sup> )                                    | 410  | 20                     | 9.9                |

**Table S5.** Comparison of electrochemical performance and cell testing conditions of the PVB@PE with previously published works.

| Separators          | Symmetric Li/Li cell test                            |              | Full (or half)-cell test         |        |                  | Ref.              |
|---------------------|------------------------------------------------------|--------------|----------------------------------|--------|------------------|-------------------|
|                     | Current density/total plating                        | Lifespan (h) | Cathode/anode materials          | C-rate | Lifespan (cycle) |                   |
| PVB@PE              | 1.0 mA cm <sup>-2</sup><br>/1.0 mAh cm <sup>-2</sup> | 275          | NCM811<br>/graphite              | 0.5 C  | 1000             | This work         |
| NS protected        | 1.0 mA cm <sup>-2</sup><br>/1.0 mAh cm <sup>-2</sup> | 250          | LFP/Li                           | 1 C    | 150              | R9 <sup>9</sup>   |
| PLL-20              | 0.2 mA cm <sup>-2</sup><br>/0.1 mAh cm <sup>-2</sup> | 350          | LFP/Li                           | 0.2 C  | 100              | R10 <sup>10</sup> |
| PP-C20              | 3 mA cm <sup>-2</sup><br>/1.0 mAh cm <sup>-2</sup>   | 200          | LFP/Li                           | 0.5 C  | 400              | R11 <sup>11</sup> |
| APP                 | 5.0 mA cm <sup>-2</sup><br>/5.0 mAh cm <sup>-2</sup> | 350          | NCM622/Li                        | 0.5 C  | 200              | R12 <sup>12</sup> |
| BS/BC               | –                                                    | –            | LFP/graphite                     | 2 C    | 500              | R13 <sup>13</sup> |
| PW@PAN              | –                                                    | –            | LFP/graphite                     | 1 C    | 400              | R14 <sup>14</sup> |
| Inorganic separator | –                                                    | –            | LFP/graphite                     | 0.1 C  | 20               | R15 <sup>15</sup> |
| LFO-FS0             | –                                                    | –            | NMC811/<br>(SiO <sub>x</sub> /G) | 0.1 C  | 100              | R16 <sup>16</sup> |

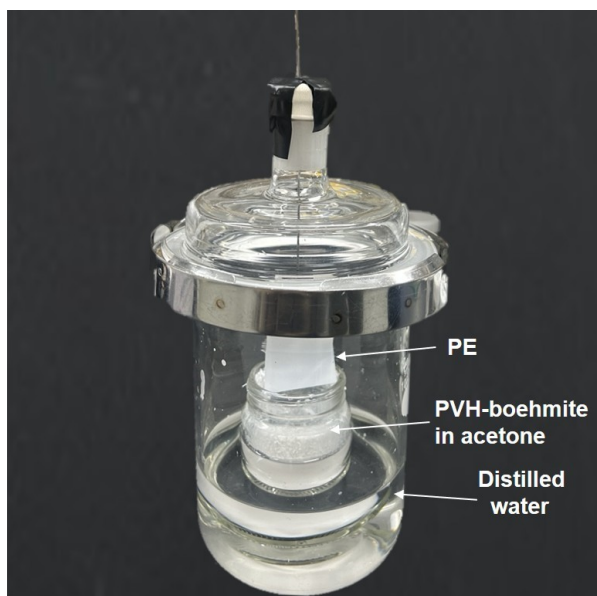

**Fig. S1.** Experimental setup for the static breath-Fig. self-assembly process.

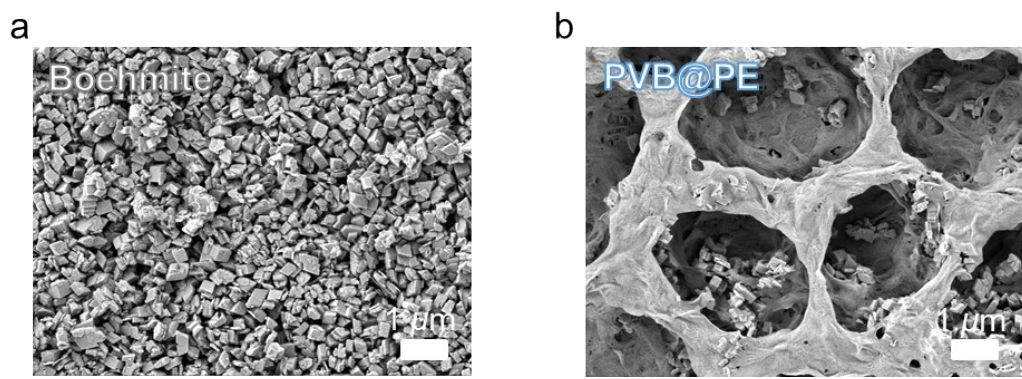

**Fig. S2.** SEM images of a) boehmite and b) PVB@PE.

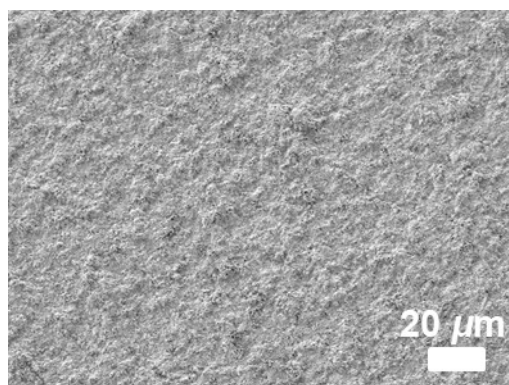

**Fig. S3.** Surface SEM image of nonporous PVB@PE prepared without breath-Fig. process.

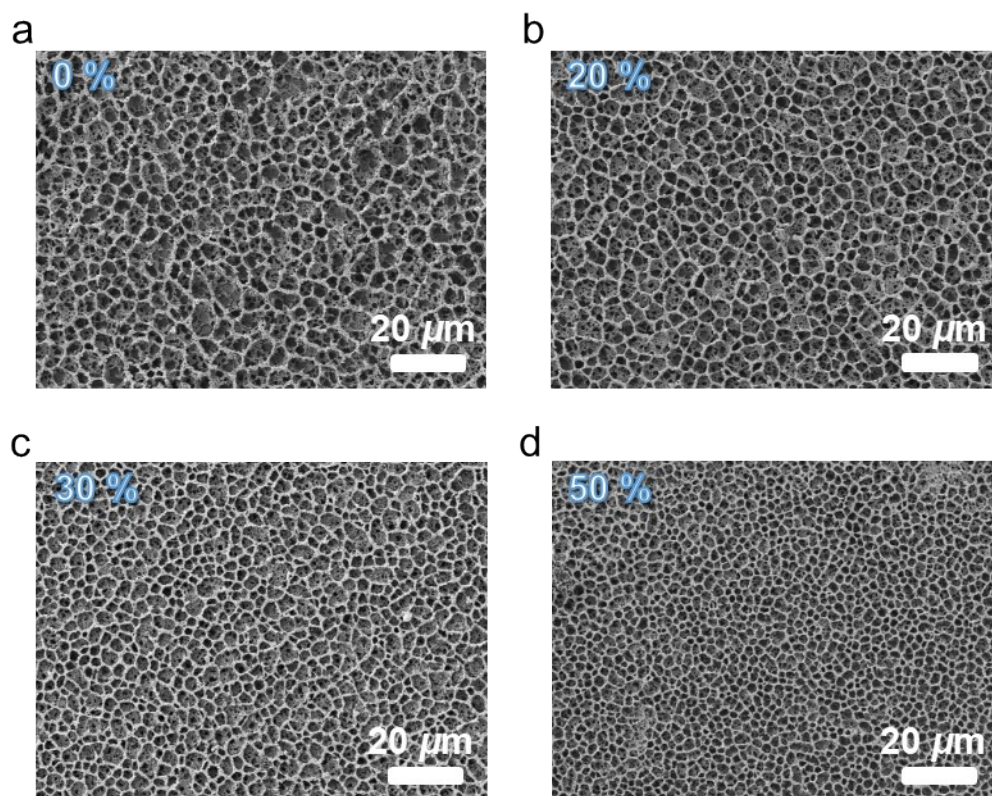

**Fig. S4.** Surface SEM images of PVB@PE prepared with different boehmite content: a) 0 wt% (PVH@PE), b) 20 wt%, c) 30 wt%, and d) 50 wt%.

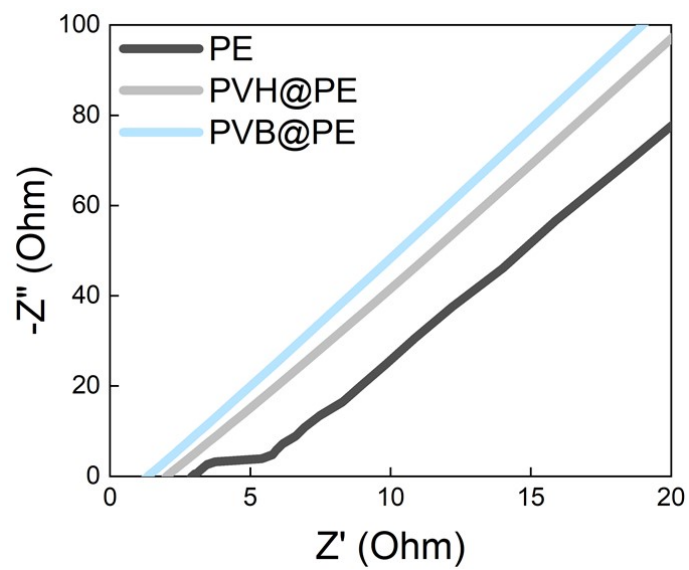

**Fig. S5.** Nyquist plots of PE, PVH@PE, and PVB@PE.

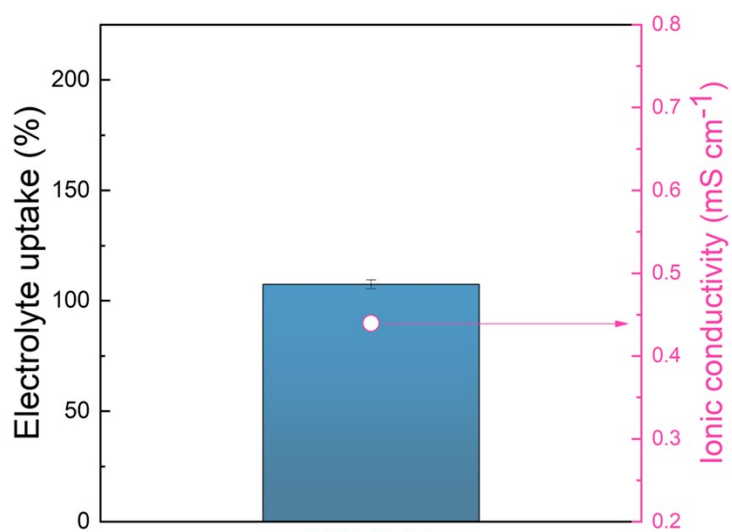

**Fig. S6.** Electrolyte uptake and ionic conductivity of nonporous PVB@PE.

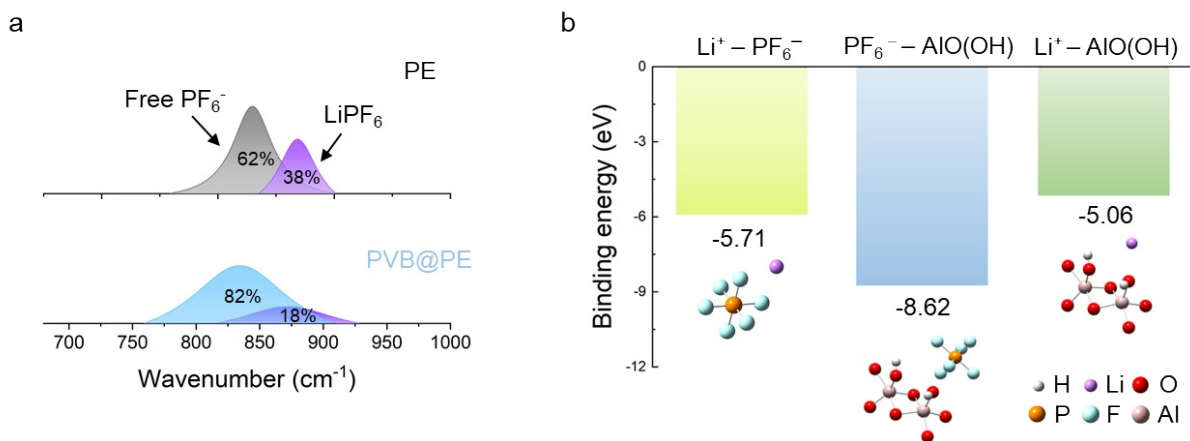

**Fig. S7.** a) Deconvoluted FT-IR spectra of  $\text{LiPF}_6$  doped separators (at a fixed  $[\text{Li}^+]/[\text{AlO(OH)}]$  ratio of 0.07) and b) DFT-calculated binding energies between  $\text{Li}^+$ ,  $\text{PF}_6^-$ , and  $\text{AlO(OH)}$  surface.

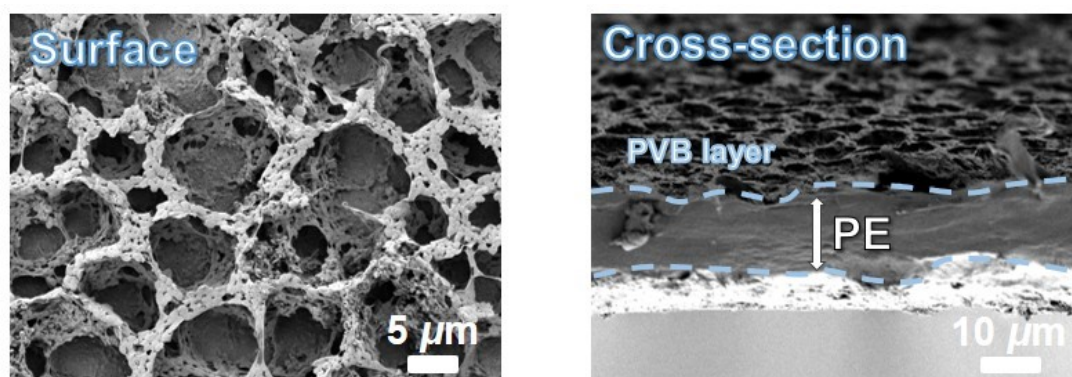

**Fig. S8.** Surface and cross-sectional SEM images of PVB@PE after 30 cycles of folding-unfolding fatigue testing.

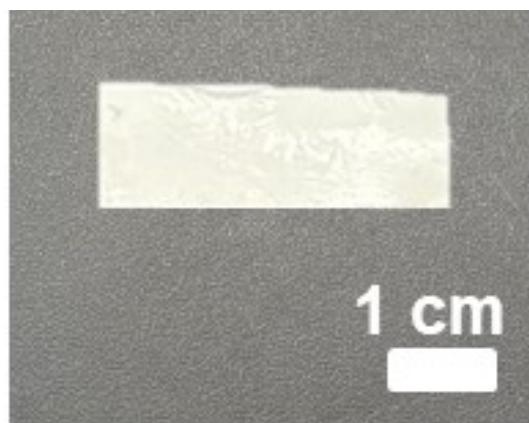

**Fig. S9.** Optical photograph of the adhesive tape used in the peeling test.

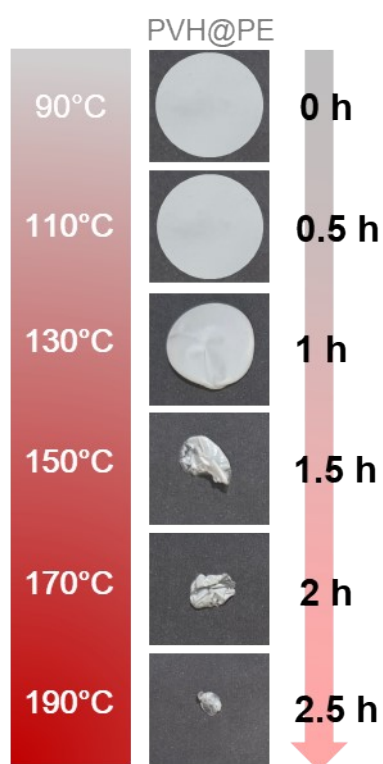

**Fig. S10.** Optical photographs of PVH@PE after heat treatment for 0.5 h at different temperatures.

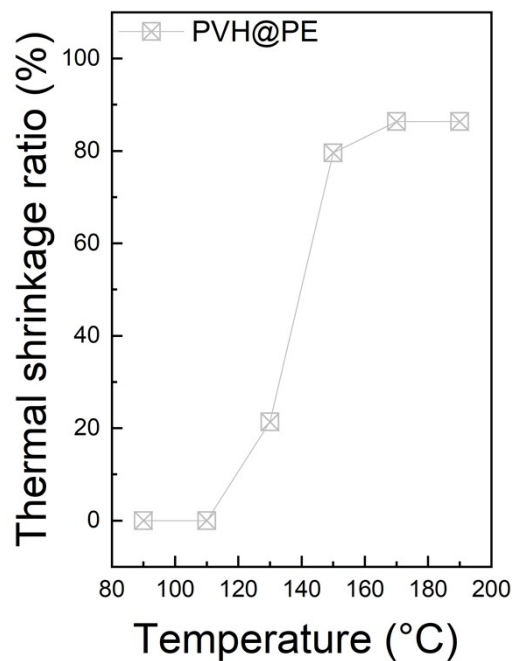

**Fig. S11.** Thermal shrinkage ratio of PVH@PE after heat treatment for 0.5 h at different temperatures (Thermal shrinkage ratio (%) =  $(S_1 - S_0) / S_0 \times 100$ ), where  $S_0$  and  $S_1$  represent the area of the samples at the initial and final heat treatment, respectively.

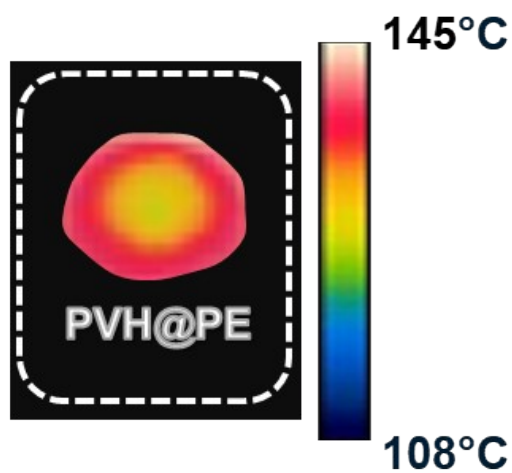

**Fig. S12.** Thermal infrared images of PVH@PE after heat treatment at 150 °C for 0.5 h.

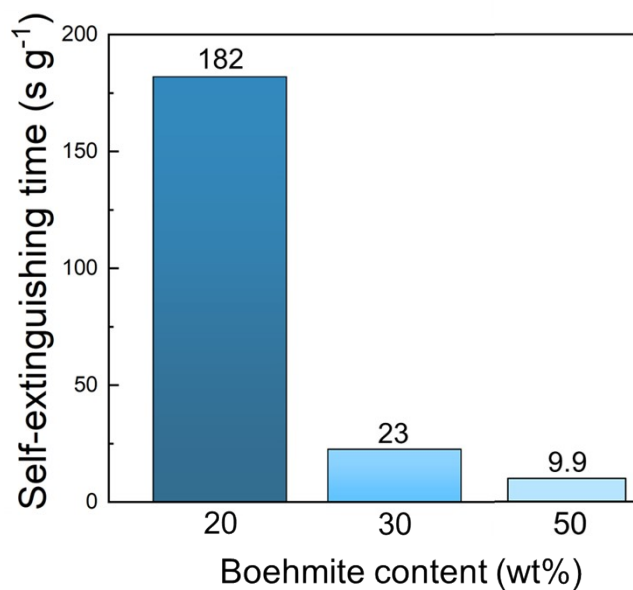

**Fig. S13.** SET of the PVB@PE containing different boehmite content.

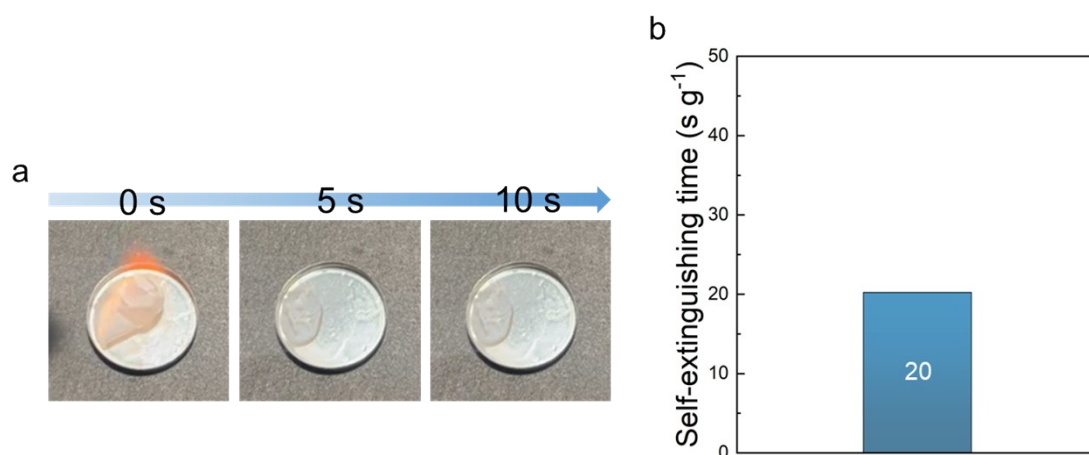

**Fig. S14.** a) Optical photographs during ignition tests and b) SET and weight loss percentage of nonporous PVB@PE prepared without breath-Fig. process wetted by 20  $\mu\text{L mg}^{-1}$  of electrolyte.

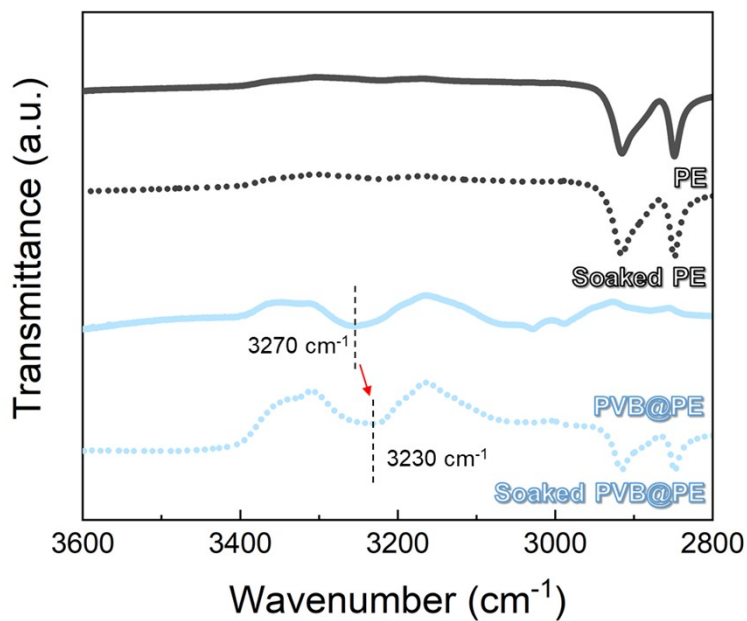

**Fig. S15.** FT-IR spectra of PE and PVB@PE before and after soaking in electrolyte for 24 h.

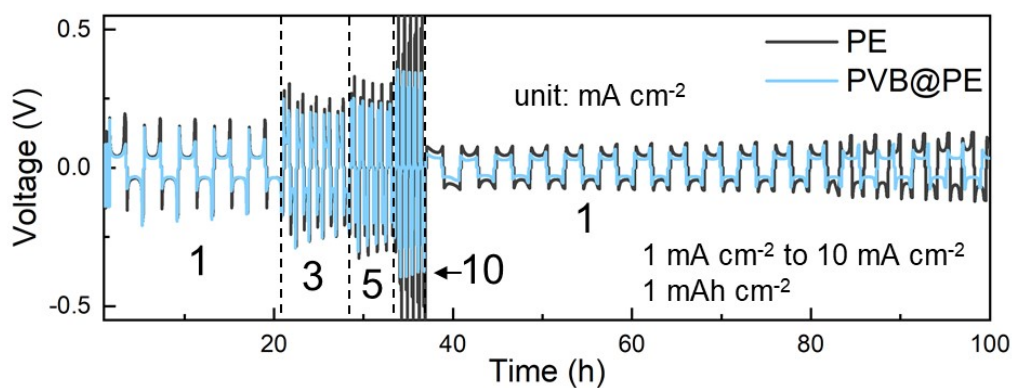

**Fig. S16.** Rate-dependent galvanostatic cycling profiles of symmetric Li/Li cells at current densities from 1 to 10 mA cm<sup>-2</sup> with an areal capacity of 1 mAh cm<sup>-2</sup> at 30 °C.

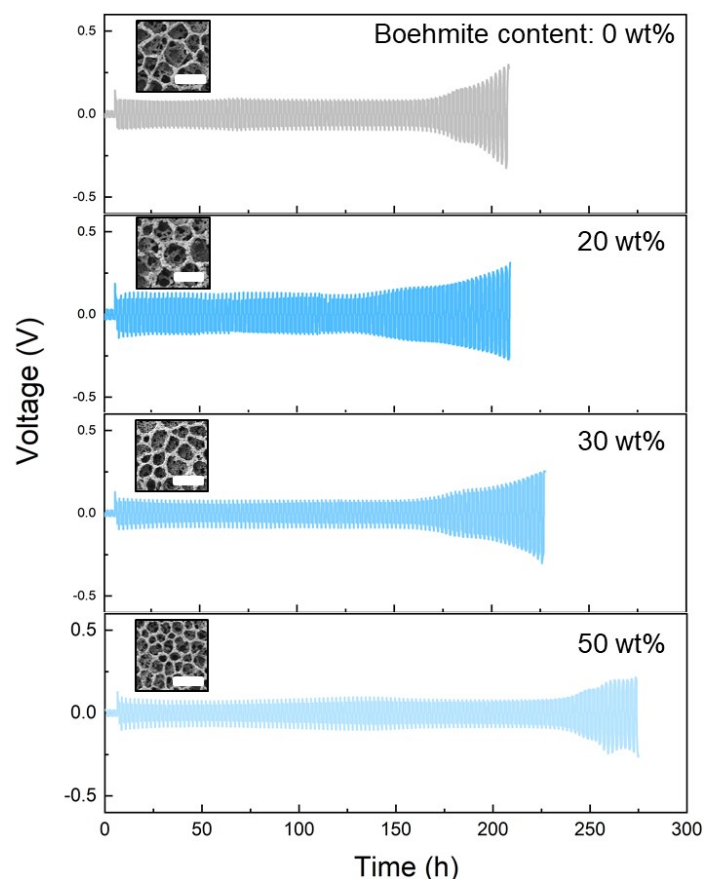

**Fig. S17.** Galvanostatic cycling profiles of symmetric Li/Li cells with different boehmite content: 0 wt%, 20 wt%, 30 wt%, and 50 wt% under a current density of  $1.0 \text{ mA cm}^{-2}$  and a total capacity of  $1.0 \text{ mAh cm}^{-2}$  at  $30 \text{ }^\circ\text{C}$ . The scale bar corresponds to  $10 \text{ }\mu\text{m}$ .

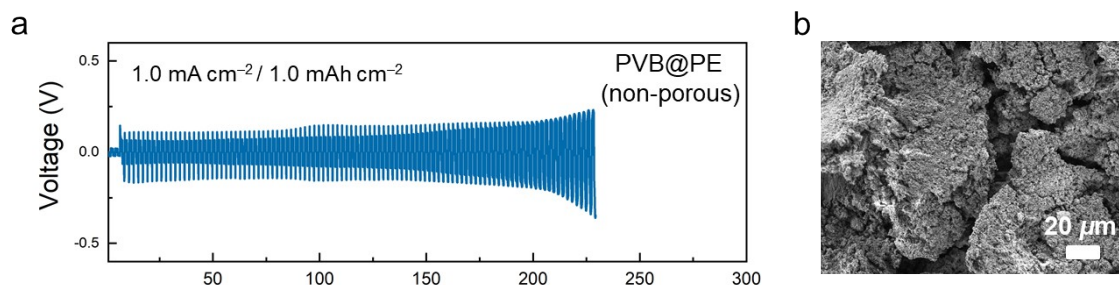

**Fig. S18.** a) Galvanostatic cycling profiles of symmetric Li/Li cells with PVB@PE (non-porous) under a current density of  $1.0 \text{ mA cm}^{-2}$  and a total capacity of  $1.0 \text{ mAh cm}^{-2}$  at  $30 \text{ }^\circ\text{C}$ . The cells were subjected to formation steps cycled under a current density of  $0.1 \text{ mA cm}^{-2}$  and a total capacity of  $0.1 \text{ mAh cm}^{-2}$  for the first three cycles before the main cycling. b) Surface SEM images of cycled Li metal anodes retrieved from PVB@PE (non-porous) after the 30th cycle.

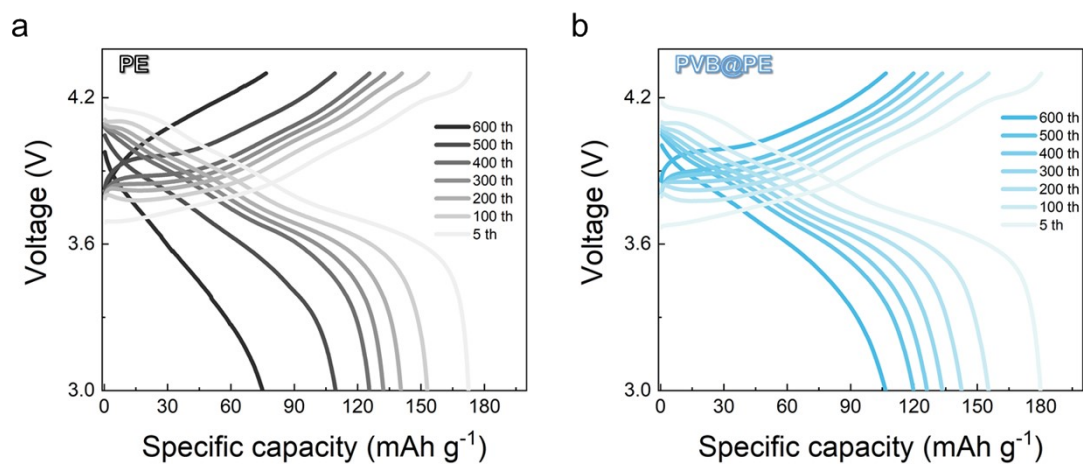

**Fig. S19.** Voltage–capacity profiles of a) PE and b) PVB@PE. The cycle number of the corresponding charge/discharge curves is indicated in the legend.

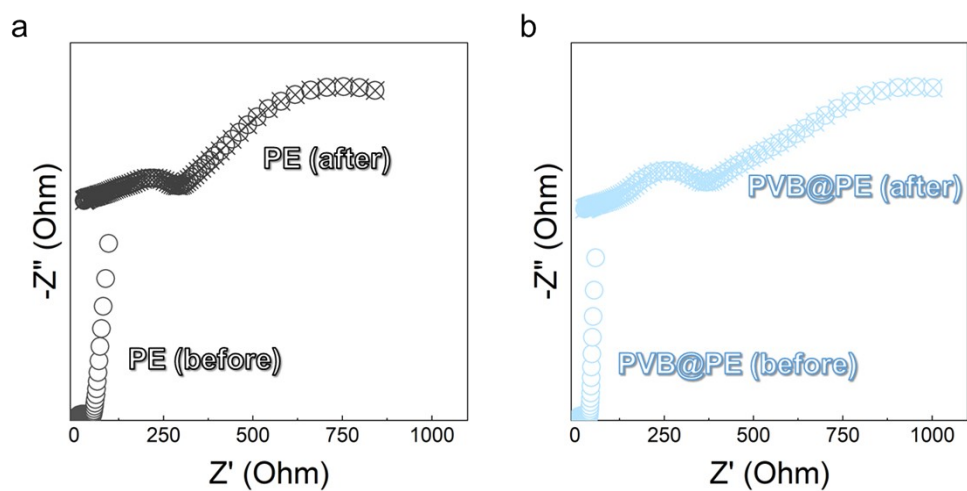

**Fig. S20.** Nyquist plots of the cells with a) PE and b) PVB@PE before and after cycling.

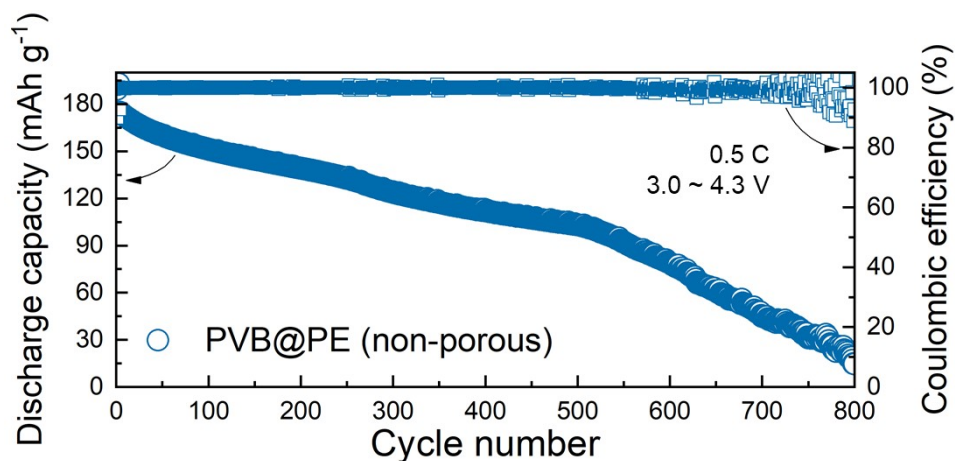

**Fig. S21.** Long-term half-cell cycling performance of Li/NCM811 cells with PVB@PE (non-porous) cycled under 0.5 C at 30 °C.

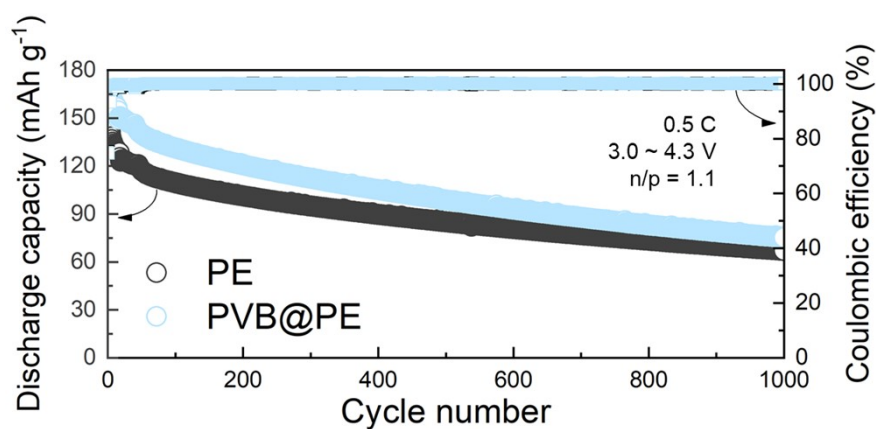

**Fig. S22.** Coin-type NCM811/graphite full cell cycling performance with PE and PVB@PE cycled under 0.5 C at 30 °C (mass loading: 15 mg cm<sup>-2</sup>, n/p ~ 1.1).

## References for Supporting Information

- 1 H. Zheng, Z. Wang, L. Shi, Y. Zhao and S. Yuan, *J. Colloid Interface Sci.* 2019, **554**, 29–38.
- 2 M. V. M. Nitou, M. Tang, Y. Niu, Y. Pang, Z. Wan, S. E. Mawuli, J. A. Leoba, F. Xiaodong and W. Lv, *ACS Appl. Mater. Interfaces*, 2024, **602**, 234406.
- 3 X. Mao, L. Shi, H. Zhang, Z. Wang, J. Zhu, Z. Qiu, Y. Zhao, M. Zhang and S. Yuan, *J. Power Sources*, 2017, **342**, 816–824.
- 4 R. Zhan, M. F. Lagadec, M. Hess and V. Wood, *J. Power Sources*, 2016, **8**, 32637–32642.
- 5 C. Han, Y. Cao, S. Zhang, L. Bai, M. Yang, S. Fang, H. Gong, D. Tang, F. Pan, Z. Jiang and J. Sun, *Small*, 2023, **19**, 2207453.
- 6 M. Hong, D. Chen, W. Zhu, G. Li, X. Zhou, W. Li and Y. Liao, *Solid State Ionics*, 2023, **19**, 116184.
- 7 X. Dong, T. Zhu, G. Liu, J. Chen, H. Li, J. Sun, X. Gu and S. Zhang, *J. Colloid Interface Sci.* 2023, **643**, 223–231.
- 8 X. Luo, X. Lu, X. Chen, Y. Chen, C. Song, C. Yu, N. Wang, D. Su, C. Wang, X. Gao, G. Wang and L. Cui, *J. Mater. Chem. A*, 2020, **8**, 14788–14798.
- 9 J. Liang, Q. Chen, X. Liao, P. Yao, B. Zhu, G. Lv, X. Wang, X. Chen and J. Zhu, *Angew. Chem. Int. Ed.* 2020, **59**, 6561–6566.
- 10 X. Fu, C. Shang, M. Yang, E. M. Akinoglu, X. Wang and G. Zhou, *J. Power Sources*, 2020, **475**, 228687.
- 11 X. Liang, Y. Zhou, D. Liu, H. Wang, J. Sun and X. Cai, *J. Power Sources*, 2025, **640**, 236765.
- 12 J. Jeong, J. Lee, J. Kim, J. Chun, D. Kang, S. M. Han, C. Jo and J. Lee, *J. Mater. Chem. A*, 2021, **9**, 7774–7781.
- 13 Y. Zhang, L. Chang, W.-S. Zhu, J. Wu, H.-P. Yu, S. Xie, D. Li, Z. Wang and H. Li, *J. Energy Chem.* 2021, **101**, 511–523.
- 14 Z. Liu, Q. Hu, S. Guo, L. and X. Hu, *Adv. Mater.* 2021, **33**, 2008088.
- 15 H. Xiang, J. Chen, Z. Li and H. Wang, *J. Power Sources*, 2011, **196**, 8651–8655.
- 16 Q. Meng, M. Fan, X. Chang, W.-P. Wang, Y.-H. Zhu, J. Wan, Y. Zhao, F. Wang, R. Wen, S. Xin and Y.-G. Guo, *Adv. Energy Mater.* 2023, **13**, 2300507.
